# Supplementary material for: Anti-Osteoarthritic Effects of Prunella Vulgaris and Gentiana Lutea In Vitro and In Vivo
Source: MDPI journal article supplement (doi:10.3390/antiox12010047), 2022-12-26
Supplement: s1 [file s1]

# Effects of loganin on bone formation and resorption *in vitro* and *in vivo*

Chang-Gun Lee, Do-Wan Kim, Jeonghyun Kim, Laxmi Prasad Uprety, Kang-Il Oh, Shivani Singh, Jisu Yoo, Hyun-Seok Jin, Tae Hyun Choi, Eunkuk Park and Seon-Yong Jeong

**Supplementary Table S1.** Gene specific primers used in this study.

| Gene         | Primer sequence                                                                                  |
|--------------|--------------------------------------------------------------------------------------------------|
| <i>Alpl</i>  | Forward: 5'-TCC CAC GTT TTC ACA TTC GG-3'<br>Reverse: 5'-CCC GTT ACC ATA TAG GAT AGC C-3'        |
| <i>Runx2</i> | Forward: 5'-TAA AGT GAC AGT GGA CGG TCC C-3'<br>Reverse: 5'-AAT GCG CCC TAA ATC ACT GAG G-3'     |
| <i>Bglap</i> | Forward: 5'-TAG TGA ACA GAC TCC GGC GCT A-3'<br>Reverse: 5'-TGT AGG CGG TCT TCA AGC CAT-3'       |
| <i>Ctsk</i>  | Forward: 5'-AAT ACC TCC CTC TCG ATC CTA CA-3'<br>Reverse: 5'-TGG TTC TTG ACT GGA GTA ACG TA-3'   |
| <i>Acp5</i>  | Forward: 5'-TGG TAT GTG CTG GCT GGA AAC-3'<br>Reverse: 5'-GCA GAG GCA TAC TTG TAC CG-3'          |
| <i>Mmp9</i>  | Forward: 5'-GCA GAG GCA TAC TTG TAC CG-3'<br>Reverse: 5'-TGA TGT TAT GAT GGT CCC ACT TG-3'       |
| <i>Gapdh</i> | Forward: 5'-AGG TCG GTG TGA ACG GAT TTG-3'<br>Reverse: 5'-TGT AGA CCA TGT AGT TGA GGT CA-3'      |
| <i>Hprt</i>  | Forward: 5'-GAG GAG TCC TGT TGA TGT TGC CAG-3'<br>Reverse: 5'-GGC TGG CCT ATA GGC TCA TAG TGC-3' |
